# Supplementary material for: Surface grafting of octylamine onto poly(ethylene-alt-maleic anhydride) gate insulators for low-voltage DNTT thin-film transistors
Source: Royal Society of Chemistry journal article supplement (doi:10.1039/c5cp06320e), 2016-01-01
Supplement: c5cp06320e1.pdf [file c5cp06320e1.pdf]

## Supplementary Information

for

Surface grafting of octylamine onto poly(ethylene-*alt*-maleic anhydride) gate insulators for low-voltage DNTT thin-film transistors

Yun-Seo Choe,<sup>ab</sup> Mi Hye Yi,<sup>a</sup> Ji-Heung Kim,<sup>b</sup> Yun Ho Kim,<sup>\*a</sup> and Kwang-Suk Jang<sup>\*a</sup>

<sup>a</sup>*Division of Advanced Materials, Korea Research Institute of Chemical Technology, Daejeon 34114, Republic of Korea. E-mail: kjang@kRICT.re.kr, yunho@kRICT.re.kr*

<sup>b</sup>*School of Chemical Engineering, Sungkyunkwan University, Suwon 16419, Republic of Korea*

1) Al deposition using thermal evaporation

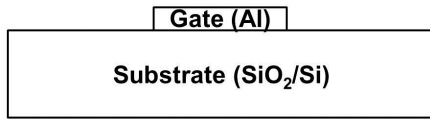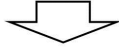

2) Spin-coating of PEMA gate insulator

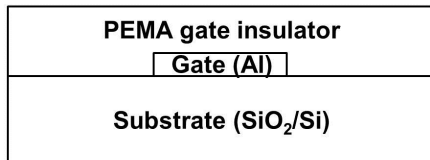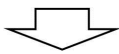

3) Octylamine treatment by spin-coating

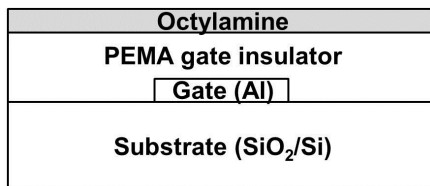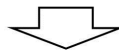

4) DNTT deposition using thermal evaporation

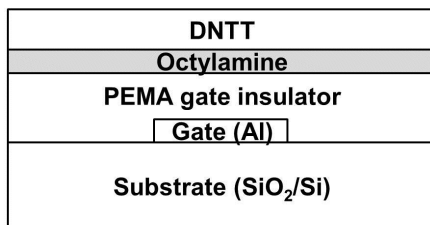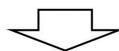

5) DNTT deposition using thermal evaporation

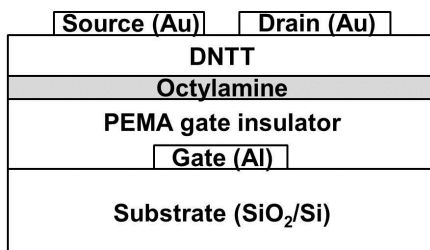

Fig. S1 Scheme of the TFT device fabrication.

non-treated

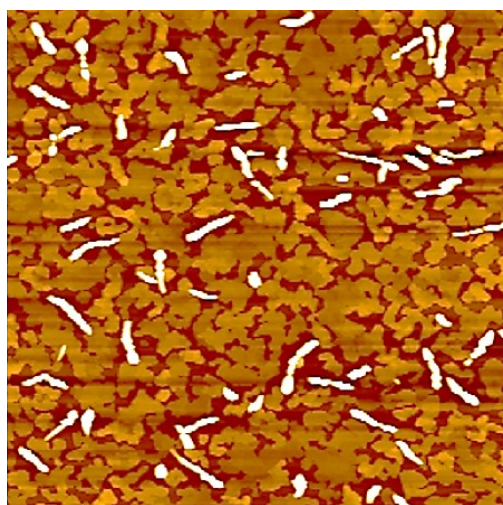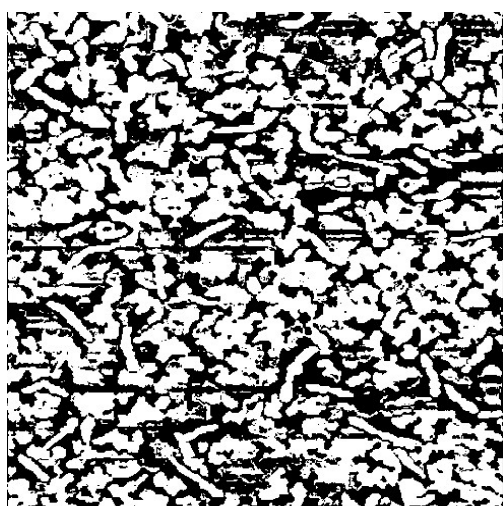

$$\rightarrow 100 - 49.544 = 50.467 \mu\text{m}^2$$

octylamine-treated

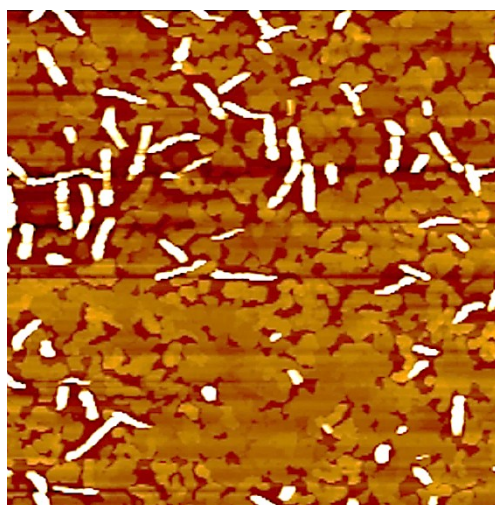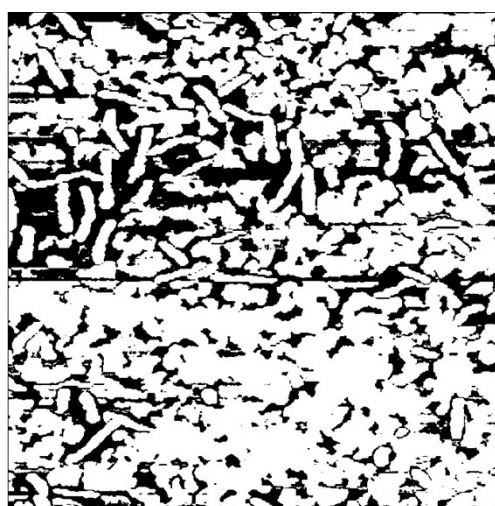

$$\rightarrow 100 - 30.711 = 69.289 \mu\text{m}^2$$

|   | Area   | Mean | Min | Max | MinThr | MaxThr |
|---|--------|------|-----|-----|--------|--------|
| 1 | 49.533 | 255  | 255 | 255 | 9      | 255    |
| 2 | 30.711 | 255  | 255 | 255 | 255    | 255    |

**Fig. S2** The surface coverage measurement of the 12 nm-thick DNTT layers on non-treated and octylamine-treated PEMA thin films.

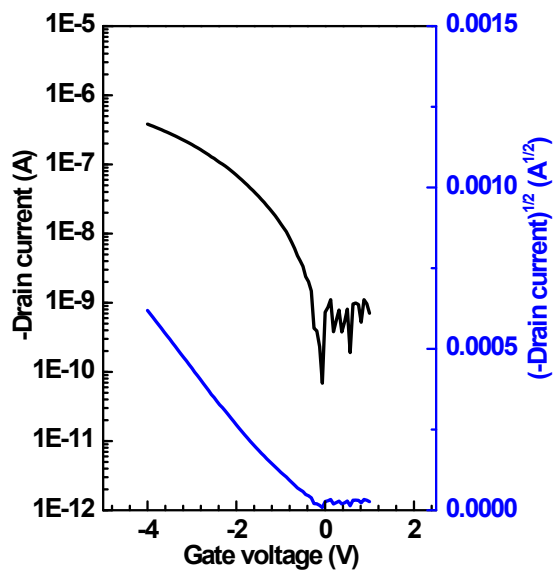

**Fig. S3** Transfer characteristic ( $I_{ds}$  vs.  $V_{gs}$ ) of the DNTT TFTs with the 60 nm-thick  $SiO_2$  gate insulator.
